# Supplementary material for: Toxicity of Ammonia Stress on the Physiological Homeostasis in the Gills of Litopenaeus vannamei under Seawater and Low-Salinity Conditions
Source: MDPI journal article supplement (doi:10.3390/biology13040281), 2024-04-21
Supplement: s1 [file s1]

## Supplementary materials

**Table S1** Primer sequences used in this study.

| Gene name      | Forward primer (5'-3')    | Reverse primer (5'-3')    |
|----------------|---------------------------|---------------------------|
| <i>nrf2</i>    | GATGAGAAGCGAGCCAGAGCG     | GCCGTCGGATGTCTCGGATAA     |
| <i>sod</i>     | GACACGACCATTAGCCTGTACGAC  | CAGCGTTGCCAGTAGCGAGTG     |
| <i>cat</i>     | TGATCGCTACAACAGTGCTGATGAG | ATGTTCTCCACCAAACGCTGACG   |
| <i>gpx</i>     | TCTGAGCGGCGAGATGGTGTC     | CTGGTGGAAGTCCCTGGTGGTC    |
| <i>hsp70</i>   | TGTGCCTGCCTACTTCAACGATTC  | CGCTCACCGCCAACCTTCTTG     |
| <i>hsp90</i>   | TTCGGCGTGCGGCTTCTACTCC    | TACTGCTCGTCGTCGTTGTTCTTG  |
| <i>trx</i>     | TCCGTCCTCCTCTTCCCACATTC   | GGCGTAGAAGTCGATGACAACCAG  |
| <i>bip</i>     | CCAGCACGACATCCAGTTCTTCC   | CCTCCGCAGCAAACACCTTCTC    |
| <i>ire1</i>    | GGTACATTAGGTTCTCGTCCGTCAC | AATTCCTCTGGTGTTGCCTTAGCC  |
| <i>xbp1</i>    | CGCCTGCTGAGGATGACCTTATTAC | GCCTACTGGTGATGTGTCCTTAACG |
| <i>casp-9</i>  | ATGGCTCGTGGTTCATTCAG      | CATCAGGGTTGAGACAATACAGG   |
| <i>casp-3</i>  | AGACGGACAGCATAACAGGAGGAC  | CTCGGCCAAGAAGTGGATGAAGAC  |
| <i>jnk</i>     | AAAGGGCATAACAGGGAGTTCAAGC | GGCACAGGTTGGCATCCATCAG    |
| <i>cytp450</i> | CAACGACACCATCAGGAGCAGAC   | CAGCAGCAGGTCCAAGAAGGC     |
| <i>gst</i>     | ACGAACACTACGAACAGAAGGATGC | GCCAGGAAGTCGATGTAGGTTAGC  |
| <i>ugt</i>     | CTGCTTCTGCTGATCCTGCTGAC   | CCTCTCCTACACCCTCTTTCTCCTC |
| <i>sult</i>    | CTGCACCACATGAGTCGTCTCTTC  | GTGTAGCCAGTACGGTCCTTGAAC  |
| <i>pdh</i>     | TCAGCCTCAACCACTACTACACTC  | GCCTCCTTCACACTCAGTACATCC  |
| <i>hk</i>      | ACCTGCTGCTGGTTCACGATG     | GCTGCTGCCTCCTCCAAGTG      |
| <i>pk</i>      | GCCAGACAGTGCCATCTCTACC    | TGCCAGCCAGTCACCACAAC      |
| <i>ldh</i>     | GATCGGCTCAGGCACCAACC      | GCAACATTAACACCAGACCAGACAG |
| <i>mdh</i>     | CTCTTCCACCCAGTTCCCAGATG   | GACAACTTACGAGCGGCAATGAC   |
| <i>cs</i>      | GCTCGGTTCCATCCATCCTCTG    | ACGCCTTCTGTTGGTGTCTTAAG   |
| <i>sdh</i>     | TTCCTGGCACTCACTATGACTGTTT | GATGAAGTAGCAGAGACCTCCCAAG |
| <i>idh</i>     | ACGGAGACCAATAAAGGCTACTG   | TGAGTGTGCGAAGGAACGGATAG   |
| <i>odh</i>     | GCAAGGCATAATCAGGGCATATCAG | CATAGGAGCGGACTACTGTTCTGG  |
| <i>ndh</i>     | CTTCTTGGTTCGGTGCTTGAATGG  | AGCAGCCTCTGAAGAGTATTGGTTG |
| <i>ATPase</i>  | CACCATCATCAACCAGAAGCGATTC | GGAGCAGCATCAGAGGCAGTG     |
| <i>cco</i>     | ATGCCAGGTGTCCGCTTCAAG     | AAGGGTCAACTTGTTCCAGTCTCC  |
| <i>coi</i>     | CCCAGATATAGCCTTCCCTCGAATG | GCGTGAGCAATACTGGCAGATAAAG |
| <i>cytc</i>    | TCGACGTGTACCTGACCAACCC    | TTGCGCTGGCTTCCTCTTCCTC    |
| <i>nka-a</i>   | TGAAATCGTGTTTGCCCGTACCTC  | ACCATCACCAGTTACAGCCACAATG |
| <i>nka-β</i>   | GAACCCAGCCGACGAAGAATACG   | CAGCAACAATAGGTGGCAGGTAGC  |
| <i>ca</i>      | CCTATTCTGGCTCCCTCACTACCC  | GTTTCATCCTCTGGGCAACACTCG  |
| <i>aqp</i>     | GCAGCCATCTTGAAGGGAGTGAC   | ACGAGGACGAAGGTGATGAGGAG   |
| <i>clc</i>     | GCCGATAGGAGGTGTGTTGTTTCAG | CGAAGAAGCCACGCCAGTAGTTC   |
| <i>ccp</i>     | CCCTGAGACCTCTGTTTGCTGTG   | TGGCAGTGTTCTTCGCATGTTCC   |
| <i>β-actin</i> | TCGCTCCCTCCACCATGAAGATC   | CTCCTGCTTGCTGATCCACATCTG  |
